1 **Reclassification of *Catabacter hongkongensis* as *Christensenella hongkongensis***

2 **comb.nov. based on whole genome analysis**

3

4 Xiaoying Liu, Jessica L. Sutter, Jacobo de la Cuesta-Zuluaga, Jillian L. Waters, Nicholas D.

5 Youngblut, Ruth E. Ley\*

6 Department of Microbiome Science, Max Planck Institute for Developmental Biology, Max-

7 Planck-Ring 5, 72076 Tübingen, Germany

8 \*Correspondence: [rley@tuebingen.mpg.de](mailto:rley@tuebingen.mpg.de)

9

10 **Keywords:** whole genome phylogeny, reclassification, *Christensenella*, *Catabacter*

11 **Abstract**

12

13 The genera *Catabacter* (family *Catabacteraceae*) and *Christensenella* (family  
14 *Christensenellaceae*) are close relatives within the phylum Firmicutes. Members of these  
15 genera are strictly anaerobic, non-spore forming, short straight rods with diverse phenotypes.  
16 Phylogenetic analysis of 16S rRNA genes suggest that *Catabacter* splits *Christensenella* into  
17 a polyphyletic clade. In an effort to ensure that family/genus names represent monophyletic  
18 clades, we performed a whole-genome based analysis of the genomes available for the  
19 cultured representatives of these genera: four species of *Christensenella* and two strains of  
20 *Catabacter hongkongensis*. A concatenated alignment of 135 shared protein sequences  
21 indicates that *C. hongkongensis* is indeed nested within the *Christensenella* clade. Based on  
22 their evolutionary relationship, we propose the transfer of *Catabacter hongkongensis* to the  
23 new genus as *Christensenella hongkongensis* comb.nov.

## 24 Introduction

25 *Catabacter hongkongensis* was first isolated in 2007 from the blood cultures of four  
26 patients in Hong Kong and Canada. Based on phylogenetic positioning of 16S rRNA  
27 sequences and phenotypic characteristics, it was proposed as a new genus and new family,  
28 *Catabacteriaceae* [1]. The genus *Catabacter* comprises just one species, with the type strain  
29 *Catabacter hongkongensis* HKU16<sup>T</sup>. Based on 16S rRNA gene sequencing surveys, *C.*  
30 *hongkongensis* has been detected in the blood of patients with diseases such as intestinal  
31 obstruction, gastrointestinal malignancy, acute cholecystitis and hypertension, in Europe,  
32 North America and Asia [1-5].

33 In 2012, Morotomi and colleagues isolated a novel bacterium from the stool of a  
34 healthy male adult, and based on 16S rRNA gene sequence analysis and physiological data,  
35 named it *Christensenella minuta* DSM 22607<sup>T</sup> within the novel family *Christensenellaceae*  
36 [6]. In addition to *Christensenella minuta* DSM 22607<sup>T</sup>, three other species have been  
37 proposed based on additional isolates from human feces: *Christensenella massiliensis*  
38 Marseille-P2438 [7], *Christensenella timonensis* Marseille-P2437 [8], and *Christensenella*  
39 *intestinihominis* AF73-05CM02<sup>PP</sup> [9]. *Christensenella intestinihominis* AF73-05CM02<sup>PP</sup> is  
40 proposed in a pending patent.

41 16S rRNA gene sequence identity (%ID) has been used to delineate genus (95 %ID)  
42 and species (98.7 %ID) cutoffs [10, 11]. The 16S rRNA gene sequence of *C. hongkongensis*  
43 HKU16<sup>T</sup> has 96-97 %ID with the 16S rRNA genes of the four species of *Christensenella*,  
44 which places them in the range of sharing a genus using that criterion. In addition to sequence  
45 similarity, the 16S rRNA gene-based phylogenetic relationships of these taxa indicate they  
46 form a monophyletic clade [12].

47 Whole genome-based analysis with concatenated protein sequences has recently  
48 replaced 16S rRNA-based phylogenetics as a basis for determining the evolutionary history

49 of members of the Bacteria and Archaea [13]. Based on whole genome comparisons,  
50 *Catabacter* and *Christensenella* were annotated as belonging to the family  
51 *Christensenellaceae* in the order *Christensenellales* in the Genome Taxonomy Database  
52 (GTDB; R05-RS95 17<sup>th</sup> July 2020) [14]. Twenty-one genomes within the family  
53 *Christensenellaceae* are included in GTDB R05-RS95 as of 01 August 2020. These include  
54 metagenome-assembled genomes and genomes derived from isolates. A formal  
55 reclassification of *Catabacter* as *Christensenella* would clarify the nomenclature of this  
56 taxon.

57       Here, we used comparative genomics as a basis for proposing that the genus name  
58 *Catabacter* and the family name Catabacteraceae be removed from the nomenclature.  
59 Genome sequences of six cultured isolates belonging to the families *Catabacteriaceae* and  
60 *Christensenellaceae* and four species from sister clades in GTDB were selected for  
61 phylogenomic analysis. The average nucleotide identity (ANI) of the six genomes in the  
62 family of *Catabacteriaceae* and *Christensenellaceae* were compared. Based on the resulting  
63 phylogeny, we recommend that *Catabacter hongkongensis* be renamed *Christensenella*  
64 *hongkongensis* comb.nov.

65

## 66 **Methods**

### 67 **Phylogeny based on whole genomes**

68       We based this analysis on whole genome sequences of six cultured isolates:  
69 *Catabacter hongkongensis* strains HKU16<sup>T</sup> and ABBA15k, *Christensenella minuta* DSM  
70 22607<sup>T</sup>, *Christensenella massiliensis* Marseille-P2438, *Christensenella timonensis* Marseille-  
71 P2437, *Christensenella intestinhominis* AF73-05CM02<sup>PP</sup>. The general information about  
72 genomes in this study is listed in Table 1. In addition, we selected for the outgroup the  
73 species *Clostridium novyi* NT (GenBank accession number: GCA\_000014125.1),

74 *Clostridium butyricum* DSM 10702<sup>T</sup> (GenBank accession number: GCA\_000409755.1),  
75 *Clostridium thermobutyricum* DSM4928<sup>T</sup> (GenBank accession number: GCA\_002050515.1)  
76 and *Eubacterium limosum* ATCC 8486<sup>T</sup> (GenBank accession number: GCA\_000807675.2).

77 Whole genome sequences were obtained from NCBI.

78 We used Anvi'o v5.2.0 for constructing the whole-genome phylogenomic tree [15].  
79 Briefly, contig databases were created from the genome FASTA files. Prodigal v2.6.3 with  
80 default settings [16] was used to identify open reading frames in contigs. Hidden Markov  
81 model (HMM) profiles were used to extract the set of single-copy marker genes defined by  
82 Campbell et al. [17]. The best HMM hit was selected if a gene was found with multiple  
83 copies in a genome. We limited the set of single-copy core genes shared to those present in  
84 all analyzed genomes and aligned the concatenated protein sequences using muscle [18].  
85 FastTree 2 [19] was used for constructing approximately-maximum-likelihood phylogenomic  
86 tree with the Jones-Taylor-Thornton model [20]. SH-like local support values [21] are  
87 shown on the nodes. The phylogenetic tree was visualized by using the online tool iTOL [22].

88

### 89 **Average nucleotide identity and phenotype predictions**

90 We used FastANI with default settings [23] to generate a pairwise ANI comparison of  
91 the six *Christensenella* and *Catabacter* genomes. A heatmap of ANI values was generated  
92 and visualized in R [24] with the package ggplot2 [25]. Traitair [26] trait analyzer was used  
93 for phenotypic trait prediction based on genome sequences. ABRicate  
94 v1.0.1 (<https://github.com/tseemann/ABRicate>) was used for the detection of genes involved  
95 in antimicrobial resistance (AMR), and the annotation was derived from the default NCBI  
96 database AMRFinderPlus.

97

### 98 **Results and Discussion**

99           The genome sizes of the six *Catabacter* and *Christensenella* species/strains range  
100 from 2.5 Mbp to 3.3 Mbp and the G+C content of genomic DNA from 48.53 to 52.07 %.  
101 Based on the pairwise comparison of the six genomes in the family of *Catabacteriaceae* and  
102 *Christensenellaceae*, we observed that the ANI of the two *Catabacter hongkongensis* strains  
103 (HKU16<sup>T</sup> and ABBA15k) was >98.97 % (Fig. 1), confirming that the two strains belong to  
104 the same species. Moreover, the ANI values for the six genomes were between 77.56-  
105 83.48 %, which corresponds to the accepted ANI cut-off 94-96 % used to designate the same  
106 species [27-29] and <83 % for inter-species ANI values [23]. *Christensenella*  
107 *intestinihominis* AF73-05CM02<sup>PP</sup> and *C. minuta* DSM 22607<sup>T</sup> showed the highest ANI  
108 similarity values (83.48%) between different species.

109           We identified 135 protein-encoding single-copy core genes present in the genomes of  
110 *Christensenella*, *Catabacter* and the outgroup taxa. We used these 135 genes in a  
111 concatenated alignment resulting in a total of 51,813 aligned amino acid sites. In the  
112 resulting phylogenetic tree (Fig. 2), the *Catabacter* and *Christensenella* species and strains  
113 formed a monophyletic clade with high bootstrap support, indicating a shared common  
114 ancestor. The species *C. timonensis* Marseille-P2437 is basal and forms a sister clade to the  
115 rest of the taxa in the phylogeny. The two strains of *Catabacter hongkongensis* (HKU16<sup>T</sup> and  
116 ABBA15k) are, as expected based on their high ANI, on the same branch of the phylogeny.  
117 The *Catabacter* branch is a sister taxon to the remaining *Christensenella* species (*C. minuta*  
118 DSM 22607<sup>T</sup>, *C. massiliensis* Marseille-P2438, *C. intestinihominis* AF73-05CM02<sup>PP</sup>).

119           The position of *Catabacter* (and its family *Catabacteriaceae*) nested within the  
120 *Christensenella* clade splits the *Christensenellaceae* family and genus, such that neither are  
121 monophyletic. For the family and genus names to represent monophyletic groups the  
122 renaming of *Catabacter hongkongensis* to *Christensenella hongkongensis* would be required.

123 As a consequence, the genus name *Catabacter* and Catabacteriaceae should be removed from  
124 the nomenclature.

125 The cultured strains of the species of *Catabacter* (*C. hongkongensis* HKU16<sup>T</sup> and  
126 ABBA15k) and *Christensenella* (*C. minuta* DSM 22607<sup>T</sup>, *C. massiliensis* Marseille-P2438,  
127 *C. timonensis* Marseille-P2437, *C. intestinhominis* AF73-05CM02<sup>PP</sup>) have been shown to be  
128 strictly anaerobic and non-spore forming rods with varied motility, Gram stain reaction and  
129 the catalase reaction [1, 6-9]. The different phenotypic characteristics of the species  
130 compared in this study is summarized in Table 1. *Catabacter hongkongensis* HKU16<sup>T</sup> and  
131 ABBA15k strains are reported to be Gram-positive, while the four species of *Christensenella*  
132 are reported either Gram-positive or Gram-negative. Morotomi and colleagues reported that  
133 *C. minuta* DSM 22607<sup>T</sup> is Gram-negative [6], while another group reports *C. minuta* stains  
134 consistently as Gram-positive [30], which is consistent with our observations [12]. The  
135 Gram-variable reaction might be due to the age of the culture for staining [31]. However,  
136 based on the phenotype predictions of the included genomes by using Traitair trait analyzer,  
137 all of the strains in those two genera are predicted to produce a cell wall that would be  
138 consistent with a Gram-positive reaction.

139 *C. hongkongensis* strains (HKU16<sup>T</sup>, HKU17, CA1, CA2) and most clinical derived  
140 isolates are reported to be motile and resistant to cefotaxime [1, 2, 5, 32] except for  
141 *C. hongkongensis* ABBA15k, which was isolated in 2016 from the blood of a patient with a  
142 fever in Sweden [33]. Strain ABBA15k showed 100% 16S rRNA gene identity with  
143 *Catabacter hongkongensis* HKU16<sup>T</sup>. However, the genome of *C. hongkongensis* ABBA15k  
144 is smaller than *C. hongkongensis* HKU16<sup>T</sup>, and the genes coding for chemotaxin (*cheA*) and  
145 flagellar assembly (*flhA* and *MotA*) were not present in the genome of *C. hongkongensis*  
146 ABBA15k [33]. The tetracycline resistance gene *tet* was detected in the genome of

147 *C. hongkongensis* HKU16<sup>T</sup>, but no resistance genes were detected in the genome of  
148 *C. hongkongensis* ABBA15k [33].

149 Screening for AMR genes of the genomes with ABRicate in this study showed that  
150 the *tet* gene was also present in the genomes of *Christensenella minuta* DSM 22607<sup>T</sup>,  
151 *Christensenella massiliensis* Marseille-P2438, *Christensenella timonensis* Marseille-P2437  
152 and *Catabacter hongkongensis* HKU16<sup>T</sup> but not in *Christensenella intestinihominis* AF73-  
153 05CM02<sup>PP</sup> and *Catabacter hongkongensis* ABBA15k. A Streptomycin resistance gene  
154 (*aadE*) was also detected in the genome of *Christensenella massiliensis* Marseille-P2438.

155 The detailed information about AMR genes is listed in Table 2. *Christensenella*  
156 *intestinihominis* AF73-05CM02<sup>PP</sup> and *Catabacter hongkongensis* HKU16<sup>T</sup> were predicted to  
157 be motile by Traitax. However, *Christensenella intestinihominis* AF73-05CM02<sup>PP</sup> was  
158 classified as non-motile in the original phenotypic characterization [9], which might be  
159 attributable to the growth conditions used. It is also possible that the genome of the strain  
160 may not contain all genes required for flagellar formation.

161 In conclusion, both *Catabacter* and *Christensenella* genera include species and  
162 strains that are strictly anaerobic, non-spore forming, short straight rods and have diverse  
163 phenotypes regarding motility, Gram-staining and antibiotic resistance. The genus  
164 *Catabacter* was proposed earlier, however, only one species exists within in genus and the  
165 family Catabacteriaceae, while four species have been proposed for the genus  
166 *Christensenella* and the family Christensenellaceae. Based on previously reported pairwise  
167 16S rRNA gene sequence identities and our genome-based phylogenomic analysis, we  
168 propose that the genus *Catabacter* and the family Catabacteriaceae be removed from the  
169 nomenclature and that the species *Catabacter hongkongensis* be renamed *Christensenella*  
170 *hongkongensis* comb.nov.

171



172 **Description of *Christensenella hongkongensis* comb.nov**

173 The description of *Christensenella hongkongensis* is identical to that proposed for *Catabacter*

174 *hongkongensis* [1].

175 The type strain is HKU16<sup>T</sup> (= DSM 18959<sup>T</sup> = JCM 17853<sup>T</sup> = CCUG 54229<sup>T</sup>).

176

177 **Acknowledgements**

178 This research was supported by the Max Planck Society.

179 **Competing interests**

180 The authors declare that they have no competing interests.

181

## 182      **References**

- 183      1.      **Lau SK, McNabb A, Woo GK, Hoang L, Fung AM *et al.*** *Catabacter*  
184 *hongkongensis* gen. nov., sp. nov., isolated from blood cultures of patients from Hong Kong  
185 and Canada. *J Clin Microbiol* 2007;45(2):395-401.
- 186      2.      **Lau SK, Fan RY, Lo HW, Ng RH, Wong SS *et al.*** High mortality associated with  
187 *Catabacter hongkongensis* bacteremia. *J Clin Microbiol* 2012;50(7):2239-2243.
- 188      3.      **Elsendoorn A, Robert R, Culos A, Roblot F, Burucoa C.** *Catabacter*  
189 *hongkongensis* Bacteremia with fatal septic shock. *Emerg Infect Dis* 2011;17(7):1330-1331.
- 190      4.      **Torri A, Delbianco F, Baccarini FD, Fusari M, Bertini S *et al.*** First report of  
191 sepsis due to *Catabacter hongkongensis* in an Italian patient. *New Microbes New Infect.*  
192 2016;9:54-55.
- 193      5.      **Choi YJ, Won EJ, Kim SH, Shin MG, Shin JH *et al.*** First Case Report of  
194 Bacteremia Due to *Catabacter hongkongensis* in a Korean Patient. *Ann Lab Med*  
195 2017;37(1):84-87.
- 196      6.      **Morotomi M, Nagai F, Watanabe Y.** Description of *Christensenella minuta* gen.  
197 nov., sp. nov., isolated from human faeces, which forms a distinct branch in the order  
198 *Clostridiales*, and proposal of *Christensenellaceae* fam. nov. *Int J Syst Evol Microbiol*  
199 2012;62(Pt 1):144-149.
- 200      7.      **Ndongo S, Khelaifia S, Fournier PE, Raoult D.** *Christensenella massiliensis*, a new  
201 bacterial species isolated from the human gut. *New Microbes New Infect.* 2016;12:69-70.
- 202      8.      **Ndongo S, Dubourg G, Khelaifia S, Fournier PE, Raoult D.** *Christensenella*  
203 *timonensis*, a new bacterial species isolated from the human gut. *New Microbes New Infect.*  
204 2016;13:32-33.
- 205      9.      **Zou Y, Xue W, Lv M, Xiao L, Li X *et al.***, inventors. *Christensenella intestinhominis*  
206 and application thereof. US20190282633A1. 2019 Sep 19.
- 207      10.     **Stackebrandt E, Goebel BM.** Taxonomic Note: A Place for DNA-DNA  
208 Reassociation and 16S rRNA Sequence Analysis in the Present Species Definition in  
209 Bacteriology. *Int J Syst Evol Microbiol* 1994;44(4):846-849.
- 210      11.     **Stackebrandt E, Ebers J.** Taxonomic parameters revisited: tarnished gold standards.  
211 *Microbiol Today* 2006;33:152-155.
- 212      12.     **Waters JL, Ley RE.** The human gut bacteria *Christensenellaceae* are widespread,  
213 heritable, and associated with health. *BMC Biol* 2019;17(1):83.
- 214      13.     **Lang JM, Darling AE, Eisen JA.** Phylogeny of Bacterial and Archaeal Genomes  
215 Using Conserved Genes: Supertrees and Supermatrices. *PLOS ONE* 2013;8(4):e62510.
- 216      14.     **Parks DH, Chuvochina M, Chaumeil P-A, Rinke C, Mussig AJ *et al.*** A complete  
217 domain-to-species taxonomy for Bacteria and Archaea. *Nature Biotechnology* 2020.
- 218      15.     **Eren AM, Esen Ö C, Quince C, Vineis JH, Morrison HG *et al.*** Anvi'o: an  
219 advanced analysis and visualization platform for 'omics data. *PeerJ* 2015;3:e1319.
- 220      16.     **Hyatt D, Chen G-L, LoCascio PF, Land ML, Larimer FW *et al.*** Prodigal:  
221 prokaryotic gene recognition and translation initiation site identification. *BMC*  
222 *Bioinformatics* 2010;11(1):119.
- 223      17.     **Campbell JH, O'Donoghue P, Campbell AG, Schwientek P, Sczyrba A *et al.***  
224 UGA is an additional glycine codon in uncultured SR1 bacteria from the human microbiota.  
225 *Proceedings of the National Academy of Sciences* 2013;110(14):5540-5545.
- 226      18.     **Edgar RC.** MUSCLE: a multiple sequence alignment method with reduced time and  
227 space complexity. *BMC Bioinformatics* 2004;5(1):113.
- 228      19.     **Price MN, Dehal PS, Arkin AP.** FastTree 2 – Approximately Maximum-Likelihood  
229 Trees for Large Alignments. *PLOS ONE* 2010;5(3):e9490.

- 230 20. **Jones DT, Taylor WR, Thornton JM.** The rapid generation of mutation data  
231 matrices from protein sequences. *Comput Appl Biosci* 1992;8(3):275-282.
- 232 21. **Guindon S, Delsuc F, Dufayard J-F, Gascuel O.** Estimating Maximum Likelihood  
233 Phylogenies with PhyML. In: Posada D (editor). *Bioinformatics for DNA Sequence Analysis*.  
234 Totowa, NJ: Humana Press; 2009. pp. 113-137.
- 235 22. **Letunic I, Bork P.** Interactive tree of life (iTOL) v3: an online tool for the display  
236 and annotation of phylogenetic and other trees. *Nucleic Acids Res* 2016;44(W1):W242-  
237 W245.
- 238 23. **Jain C, Rodriguez-R LM, Phillippy AM, Konstantinidis KT, Aluru S.** High  
239 throughput ANI analysis of 90K prokaryotic genomes reveals clear species boundaries.  
240 *Nature Communications* 2018;9(1):5114.
- 241 24. **R Core Team.** *R: a language and environment for statistical computing*. R  
242 Foundation for Statistical Computing, Vienna, Austria; 2017.
- 243 25. **Wickham H.** *ggplot2: Elegant Graphics for Data Analysis*: Springer Publishing  
244 Company, Incorporated; 2009.
- 245 26. **Weimann A, Mooren K, Frank J, Pope PB, Bremges A et al.** From Genomes to  
246 Phenotypes: Traitair, the Microbial Trait Analyzer. *mSystems* 2016;1(6).
- 247 27. **Konstantinidis KT, Tiedje JM.** Genomic insights that advance the species definition  
248 for prokaryotes. *Proc Natl Acad Sci USA* 2005;102(7):2567-2572.
- 249 28. **Goris J, Konstantinidis KT, Klappenbach JA, Coenye T, Vandamme P et al.**  
250 DNA-DNA hybridization values and their relationship to whole-genome sequence  
251 similarities. *Int J Syst Evol Microbiol* 2007;57(Pt 1):81-91.
- 252 29. **Richter M, Rosselló-Móra R.** Shifting the genomic gold standard for the prokaryotic  
253 species definition. *Proceedings of the National Academy of Sciences* 2009;106(45):19126-  
254 19131.
- 255 30. **Alonso BL, Irigoyen von Sierakowski A, Sáez Nieto JA, Rosel AB.** First report of  
256 human infection by *Christensenella minuta*, a gram-negative, strictly anaerobic rod that  
257 inhabits the human intestine. *Anaerobe* 2017;44:124-125.
- 258 31. **Rand KH, Tillan M.** Errors in interpretation of Gram stains from positive blood  
259 cultures. *Am J Clin Pathol* 2006;126(5):686-690.
- 260 32. **Ryu J, Kim Y, Lee J, Cho SY, Park TS et al.** A Case of *Catabacter hongkongensis*  
261 and *Alistipes indistinctus* Isolated from Blood Cultures of a Patient with Acute Appendicitis.  
262 *Imo* 2019;9(3):177-180.
- 263 33. **Kaden R, Thelander M, Engstrand L, Herrmann B.** First case of human  
264 bacteraemia by *Catabacter hongkongensis* in Scandinavia. *New Microbes New Infect*.  
265 2016;15:6-8.  
266

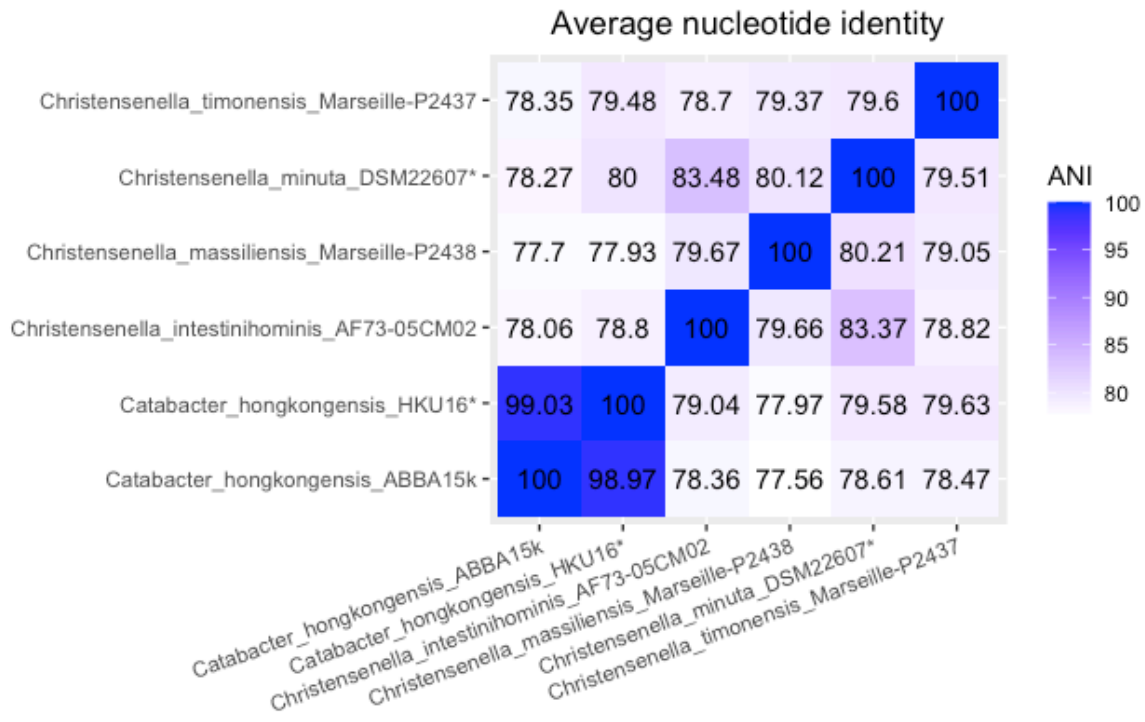

267

268 Fig. 1 Heatmap of ANI values amongst the genomes of *Catabacter hongkongensis* strains  
 269 and *Christensenella* species in this study. Type strains are marked with asterisk.

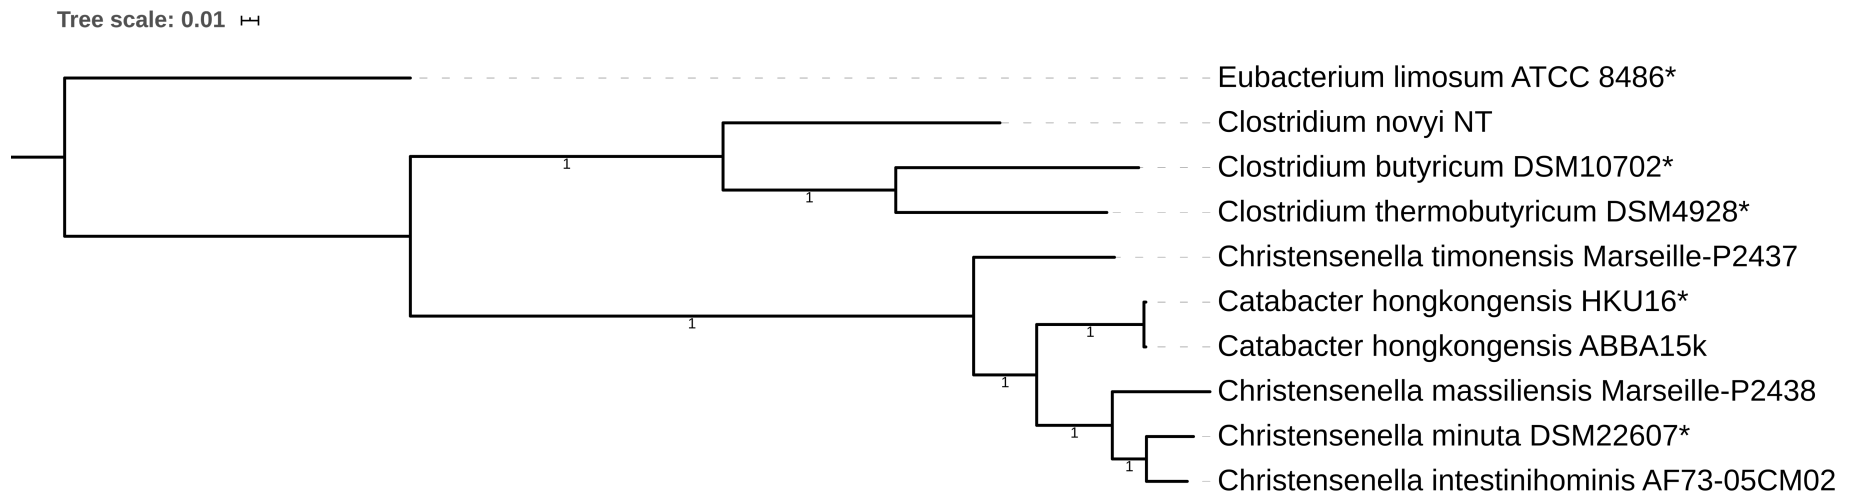

270

271 Fig. 2 Phylogeny reconstructed by approximately-maximum-likelihood showing the position of *Catabacter* relative to *Christensenella* based on  
 272 135 concatenated core protein sequences with 51,813 aligned amino acid sites. All the nodes are strongly supported with SH-like support values  
 273 of 1. Type strains are marked with asterisk. *Clostridium* and *Eubacterium* are used for the outgroup. The tree is rooted by *Eubacterium limosum*  
 274 ATCC 8486. Scale bar indicates 0.01 amino acid substitutions per site.

275 Table 1 Phenotypic characteristics of the strains of *Catabacter* and *Christensenella* based on literature review. Data for the strains are from  
 276 references [1, 6-9, 30]. +, Positive; -, negative; ND, not determined. The G+C contents and N50, contig numbers, genome size and genome  
 277 coverages were retrieved from the GTDB records of the strains.

| Characteristics              | <i>Christensenella minuta</i><br>DSM 22607 <sup>T</sup> | <i>Christensenella intestinhominis</i><br>AF73-05CM02 <sup>PP</sup>                                         | <i>Christensenella massiliensis</i><br>Marseille-P2438 | <i>Christensenella timonensis</i><br>Marseille-P2437 | <i>Catabacter hongkongensis</i>     |                 |
|------------------------------|---------------------------------------------------------|-------------------------------------------------------------------------------------------------------------|--------------------------------------------------------|------------------------------------------------------|-------------------------------------|-----------------|
|                              |                                                         |                                                                                                             |                                                        |                                                      | HKU16 <sup>T</sup>                  | ABBA15k         |
| Gram stain                   | Negative/Positive                                       | Positive                                                                                                    | Negative                                               | Negative                                             | Positive                            | Positive        |
| Motility                     | Nonmotile                                               | Nonmotile                                                                                                   | Nonmotile                                              | Nonmotile                                            | Motile                              | Nonmotile       |
| Catalase activity            | -                                                       | -                                                                                                           | -                                                      | -                                                    | +                                   | ND              |
| Metabolite utilization       | Arabinose, Glucose, Mannose, Rhamnose, Salicin, Xylose  | Arabinose, Glucose, Mannose, Rhamnose, Xylose, Mannitol, Maltose, Sulphate, Pine syrup, Raffinose, Sorbitol | ND                                                     | ND                                                   | Arabinose, Glucose, Mannose, Xylose | ND              |
| G+C content (%)              | 51.48%                                                  | 52.07%                                                                                                      | 50.38%                                                 | 51.71%                                               | 48.53%                              | 48.79%          |
| Contig number                | 45                                                      | 36                                                                                                          | 1                                                      | 2                                                    | 134                                 | 113             |
| Protein count                | 2776                                                    | 2791                                                                                                        | 2437                                                   | 2430                                                 | 3071                                | 2625            |
| Completeness (Contamination) | 98.39% (0.81%)                                          | 99.19% (0.81%)                                                                                              | 98.79 % (0.81%)                                        | 97.98% (0.81%)                                       | 97.55% (2.97%)                      | 97.9% (3.5%)    |
| Genome size                  | 2,940,227 bp                                            | 3,026,655 bp                                                                                                | 2,560,186 bp                                           | 2,650,850 bp                                         | 3,203,641 bp                        | 2,797,114 bp    |
| GenBank Assembly Accession   | GCA_001678855.1                                         | GCA_001678845.1                                                                                             | GCA_900155415.1                                        | GCA_900087015.1                                      | GCA_000981035.1                     | GCA_001507385.1 |

278  
279  
280  
281

Table 2 Antimicrobial resistance genes (AMR) detected for the genomes of *Catabacter hongkongensis* strains and *Christensenella* species. Coverage refers to the proportion of the gene in the reference gene sequence.

| Strain                                                  | Contig<br>(Position Strand)           | Reference Gene<br>(Accession)   | Coverage    | Identity % | Gene product                                                       | Resistance   |
|---------------------------------------------------------|---------------------------------------|---------------------------------|-------------|------------|--------------------------------------------------------------------|--------------|
| <i>Christensenella timonensis</i><br>Marseille-P2437    | FLKP01000002.1<br>(1477797–1479716 +) | <i>tet(W)</i><br>(NG_048299.1)  | 1-1920/1920 | 99.53      | tetracycline resistance<br>ribosomal protection<br>protein Tet(W)  | TETRACYCLINE |
|                                                         | FLKP01000002.1<br>(1480702–1481922 +) | <i>tet(40)</i><br>(NG_048141.1) | 1-1221/1221 | 99.67      | tetracycline efflux MFS<br>transporter Tet(40)                     | TETRACYCLINE |
| <i>Christensenella massiliensis</i><br>Marseille-P2438  |                                       | <i>tet(W)</i><br>(NG_048281.1)  | 1-1920/1920 | 100        | tetracycline resistance<br>ribosomal protection<br>protein Tet(W)  | TETRACYCLINE |
|                                                         | LT700187.1<br>(1980989–1981855 +)     | <i>aadE</i><br>(NG_047378.1)    | 1-867/867   | 99.77      | aminoglycoside 6-<br>adenylyltransferase<br>AadE                   | STREPTOMYCIN |
| <i>Catabacter hongkongensis</i><br>HKU16 <sup>T</sup>   | LAYJ01000061.1<br>(37275–39194 +)     | <i>tet(32)</i><br>(NG_048125.1) | 1-1920/1920 | 100        | tetracycline resistance<br>ribosomal protection<br>protein Tet(32) | TETRACYCLINE |
| <i>Christensenella minuta</i><br>DSM 22607 <sup>T</sup> | MAIR01000011.1<br>(54376-56295 +)     | <i>tet(W)</i><br>(NG_048281.1)  | 1-1920/1920 | 100        | tetracycline resistance<br>ribosomal protection<br>protein Tet(W)  | TETRACYCLINE |

282
